# Supplementary material
Source: ML conference proceedings conference paper supplement (https://openaccess.thecvf.com/content/CVPR_2020/html/Liu_Globally_Optimal_Contrast_CVPR_2020_paper.html)
Supplement: Supplementary file 1 [file Liu_Globally_Optimal_Contrast_CVPR_2020_supplemental.pdf]

# Supplementary material for: Globally Optimal Contrast Maximisation for Event-based Motion Estimation

Daqi Liu    Álvaro Parra    Tat-Jun Chin  
School of Computer Science, The University of Adelaide  
{daqi.liu, alvaro.parrabustos, tat-jun.chin}@adelaide.edu.au

## A. Geometric derivations of the elliptical region

Here we present the analytic form of the centre  $\mathbf{c}$ , semi-major axis  $\mathbf{y}$ , and semi-minor axis  $\mathbf{z}$  of the elliptical region  $\mathcal{L}$  (see Sec. 3.1 in the main text) following the method in [1, 2] (subscript  $i$  and explicit dependency on  $\mathbb{B}$  are omitted for simplicity). See Fig. 2a in the main text for a visual representation of the aforementioned geometric entities.

1. Calculate direction of the cone-beam

$$\hat{\mathbf{u}} = \frac{\mathbf{R}(t; \boldsymbol{\omega}_c) \tilde{\mathbf{u}}}{\|\mathbf{R}(t; \boldsymbol{\omega}_c) \tilde{\mathbf{u}}\|_2}, \quad (1)$$

its radius

$$r = \sin \alpha(\mathbb{B}), \quad (2)$$

and the norm vector to the image plane  $\hat{\mathbf{n}} = [0 \ 0 \ 1]^T$ .

2. Calculate the semi-major axis direction within the cone-beam

$$\hat{\mathbf{y}} = \frac{\hat{\mathbf{u}} \times (\hat{\mathbf{u}} \times \hat{\mathbf{n}})}{\|\hat{\mathbf{u}} \times (\hat{\mathbf{u}} \times \hat{\mathbf{n}})\|} \quad (3)$$

and semi-minor axis direction

$$\hat{\mathbf{z}} = \frac{\hat{\mathbf{y}} \times \hat{\mathbf{n}}}{\|\hat{\mathbf{y}} \times \hat{\mathbf{n}}\|}. \quad (4)$$

3. Calculate the intersecting points between the ray with the direction of the semi-major axis and the cone-beam

$$\begin{aligned} \mathbf{y}^{(a)} &= \hat{\mathbf{u}} - r \hat{\mathbf{y}} \\ \mathbf{y}^{(b)} &= \hat{\mathbf{u}} + r \hat{\mathbf{y}}, \end{aligned} \quad (5)$$

and the analogous points for the semi-minor axis

$$\begin{aligned} \mathbf{z}^{(a)} &= \hat{\mathbf{u}} - r \hat{\mathbf{z}} \\ \mathbf{z}^{(b)} &= \hat{\mathbf{u}} + r \hat{\mathbf{z}}. \end{aligned} \quad (6)$$

4. Obtain  $\mathbf{y}'^{(a)}$ ,  $\mathbf{y}'^{(b)}$ ,  $\mathbf{z}'^{(a)}$  and  $\mathbf{z}'^{(b)}$  as the projection of (5) and (6) into the image plane with the intrinsic matrix  $\mathbf{K}$ .

5. Calculate  $\mathbf{c} = 0.5(\mathbf{y}'^{(a)} + \mathbf{y}'^{(b)})$ ,  $\mathbf{y} = \|\mathbf{y}'^{(a)} - \mathbf{y}'^{(b)}\|_2$ , and  $\mathbf{z} = \|\mathbf{z}'^{(a)} - \mathbf{z}'^{(b)}\|_2$ .

## B. Proofs

We state our integer quadratic problem again.

$$\begin{aligned} \bar{S}_d^*(\mathbb{B}) &= \max_{\mathbf{z} \in \{0,1\}^{N \times K}} \sum_{k=1}^K \left( \sum_{i=1}^N \mathbf{z}_{i,k} \mathbf{M}_{i,k} \right)^2 \\ \text{s.t. } &\mathbf{z}_{i,k} \leq \mathbf{M}_{i,k}, \quad \forall i, k, \\ &\sum_{k=1}^K \mathbf{z}_{i,k} = 1, \quad \forall i. \end{aligned} \quad (\text{IQP})$$

### B.1. Proof of Lemma 1 in the main text

**Lemma 1.**

$$\bar{H}_c(\mathbf{x}_j; \mathbb{B}) \geq \max_{\boldsymbol{\omega} \in \mathbb{B}} H_c(\mathbf{x}_j; \boldsymbol{\omega}) \quad (7)$$

with equality achieved if  $\mathbb{B}$  is singleton, i.e.,  $\mathbb{B} = \{\boldsymbol{\omega}\}$ .

*Proof.* This lemma can be demonstrated by contradiction. Let  $\boldsymbol{\omega}^*$  be the optimiser for the RHS of (7). If

$$H_c(\mathbf{x}_j; \boldsymbol{\omega}^*) > \bar{H}_c(\mathbf{x}_j; \mathbb{B}), \quad (8)$$

it follows from the definition of pixel intensity (Eq. (1) in the main text) and its upper bound (Eq. (23) in the main text) that

$$\|\mathbf{x}_j - f(\mathbf{u}_i, t_i, \boldsymbol{\omega}^*)\| < \max(\|\mathbf{x}_j - \mathbf{c}_i(\mathbb{B})\| - \|\mathbf{y}_i(\mathbb{B})\|, 0), \quad (9)$$

for at least one  $i = 1, \dots, N$ .

In words, the shortest distance between  $\mathbf{x}_j$  and the disc  $\mathcal{D}_i(\mathbb{B})$  is greater than the distance between  $\mathbf{x}_j$  and the optimal position  $f(\mathbf{u}_i, t_i, \boldsymbol{\omega}^*)$ . However,  $f(\mathbf{u}_i, t_i, \boldsymbol{\omega}^*)$  is always inside the disc  $\mathcal{D}_i(\mathbb{B})$ , and hence Eq. (9) cannot hold. If  $\mathbb{B} = \{\boldsymbol{\omega}\}$ , then from definition (23) in the main text  $\bar{H}_c(\mathbf{x}_j; \mathbb{B}) = H_c(\mathbf{x}_j; \boldsymbol{\omega})$ .  $\square$

### B.2. Proof of Lemma 2 in the main text

**Lemma 2.**

$$\bar{S}_d^*(\mathbb{B}) \geq \max_{\boldsymbol{\omega} \in \mathbb{B}} \sum_{j=1}^P H_d(\mathbf{x}_j; \boldsymbol{\omega})^2, \quad (10)$$

with equality achieved if  $\mathbb{B}$  is singleton, i.e.,  $\mathbb{B} = \{\omega\}$ .

*Proof.* We pixel-wisely reformulate **IQP**:

$$\begin{aligned} \bar{S}_d^*(\mathbb{B}) &= \max_{\mathbf{Q} \in \{0,1\}^{N \times P}} \sum_{j=1}^P \left( \sum_{i=1}^N \mathbf{Q}_{i,j} \right)^2 \\ \text{s.t. } &\mathbf{Q}_{i,j} \leq \mathbf{T}_{i,j}, \quad \forall i, j, \quad (\text{P-IQP}) \\ &\sum_{j=1}^P \mathbf{Q}_{i,j} = 1, \quad \forall i, \end{aligned}$$

and we express the RHS of (10) as a mixed integer quadratic program:

$$\begin{aligned} \omega \in \mathbb{B}, \mathbf{Q} \in \{0,1\}^{N \times P} \quad &\sum_{j=1}^P \left( \sum_{i=1}^N \mathbf{Q}_{i,j} \right)^2 \\ \text{s.t. } &\mathbf{Q}_{i,j} = \mathbb{I}(f(\mathbf{u}_i, t_i; \omega) \text{ in } \mathbf{x}_j), \quad \forall i, j, \\ &(\text{MIQP}) \end{aligned}$$

Problem **P-IQP** is a relaxed version of **MIQP** - hence (10) holds - as for every  $e_i$ , the feasible pixel  $\mathbf{x}_j$  is in  $\mathcal{D}_i(\mathbb{B})$ ; whereas for **MIQP**, the feasible pixel is dictated by a single  $\omega \in \mathbb{B}$ . If  $\mathbb{B}$  collapses into  $\omega$ , every event  $e_i$  can intersect only one pixel  $\mathbf{x}_j$ , hence  $\mathbf{T}_{i,j} = \mathbb{I}(f(\mathbf{u}_i, t_i; \omega) \text{ in } \mathbf{x}_j)$ ,  $\forall i, j$ ;  $\sum_{j=1}^P \mathbf{T}_{i,j} = 1$ ,  $\forall i$ ; and  $\sum_{j=1}^P \mathbf{Q}_{i,j} = 1 \implies \mathbf{Q}_{i,j} = \mathbf{T}_{i,j}, \forall i$ ; therefore, **MIQP** is equivalent to **P-IQP** if  $\mathbb{B} = \{\omega\}$ .  $\square$

### B.3. Proof of Lemma 3 in the main text

**Lemma 3.** *Problem **IQP** has the same solution if  $\mathbf{M}$  is replaced with  $\mathbf{M}'$ .*

*Proof.* We show that removing an arbitrary non-dominant column from  $\mathbf{M}$  does not change the solution of **IQP**. Without loss of generality, assume the last column of  $\mathbf{M}$  is non-dominant. Equivalent to solving **IQP** on  $\mathbf{M}$  without its last column is the following **IQP** reformulation:

$$\bar{S}_d^*(\mathbb{B}) = \max_{\mathbf{Z} \in \{0,1\}^{N \times K}} \sum_{k=1}^{K-1} \left( \sum_{i=1}^N \mathbf{Z}_{i,k} \mathbf{M}_{i,k} \right)^2 + \quad (11a)$$

$$\left( \sum_{i=1}^N \mathbf{Z}_{i,K} \mathbf{M}_{i,K} \right)^2 \quad (11b)$$

$$\text{s.t. } \mathbf{Z}_{i,k} \leq \mathbf{M}_{i,k}, \quad \forall i, k, \quad (11c)$$

$$\sum_{k=1}^K \mathbf{Z}_{i,k} = 1, \quad \forall i, \quad (11d)$$

$$\mathbf{Z}_{i,K} = 0, \quad \forall i, \quad (11e)$$

which is same as **IQP** but with additional constraint (11e). Since  $\mathbf{M}_{:,K}$  is non-dominant, it must exists a dominant column  $\mathbf{M}_{:,i}$  such that

$$\mathbf{M}_{i,K} \leq \mathbf{M}_{i,i}, \quad \forall i. \quad (12)$$

Hence, if  $\mathbf{M}_{i,K} = 1$ , then  $\mathbf{M}_{i,i} = 1$  must holds  $\forall i$ . Let  $\mathbf{Z}^*$  be the optimiser of **IQP** with  $\mathbf{Z}_{i_a,K}^*, \dots, \mathbf{Z}_{i_b,K}^* = 1$ . Let define  $\mathbf{Z}'^*$  same as  $\mathbf{Z}^*$  but with  $\mathbf{Z}_{:,K}^* = \mathbf{0}$  and  $\mathbf{Z}_{i_a,\eta}^*, \dots, \mathbf{Z}_{i_b,\eta}^* = 1$ . In words, we “move” the 1 values from the last column to its dominant one. We show that  $\mathbf{Z}'^*$  is an equivalent solution (same objective value than  $\mathbf{Z}^*$ ).  $\mathbf{Z}'^*$  is feasible since (12) ensures condition (11c), (11d) is not affected by “moving ones” in the same row, and (11e) is true for the definition of  $\mathbf{Z}'^*$ . Finally we show that

$$\sum_{i=1}^N \mathbf{Z}_{i,K}^* \mathbf{M}_{i,K} = \sum_{i=1}^N \mathbf{Z}_{i,\eta}^* \mathbf{M}_{i,\eta} \quad (13)$$

therefore  $\mathbf{Z}'^*$  produces same objective value than **IQP**. We prove (13) by contradiction. Assume exists at least one  $i' \notin \{i_a, \dots, i_b\}$  such that  $\mathbf{Z}_{i',\eta}^* = 1 \implies \mathbf{Z}_{i',K}^* = 1$ . Then,  $\mathbf{Z}'^*$  produces a larger objective value than  $\mathbf{Z}^*$  which is a contradiction since problem (11) is most restricted than **IQP**. Thus, removing any arbitrary non-dominant column will not change the solution which implies this is also true if we remove all non-dominant columns (i.e., if we replace  $\mathbf{M}$  with  $\mathbf{M}'$ ).  $\square$

### B.4. Proof of Lemma 4 in the main text

**Lemma 4.**

$$\bar{S}_d(\mathbb{B}) \geq \bar{S}_d^*(\mathbb{B}) \quad (14)$$

with equality achieved if  $\mathbb{B}$  is singleton, i.e.,  $\mathbb{B} = \{\omega\}$ .

*Proof.* To prove (14), it is enough to show

$$\begin{aligned} \bar{S}_d(\mathbb{B}) &= \max_{\mathbf{Z} \in \{0,1\}^{N \times K'}} \sum_{k=1}^{K'} \left( \sum_{i=1}^N \mathbf{Z}_{i,k} \mathbf{M}'_{i,k} \right)^2 \\ \text{s.t. } &\mathbf{Z}_{i,k} \leq \mathbf{M}'_{i,k}, \quad \forall i, k, \quad (\text{R-IQP}) \\ &\sum_{k=1}^{K'} \sum_{i=1}^N \mathbf{Z}_{i,k} = N, \end{aligned}$$

is a valid relaxation of **IQP**. This is true as the constraint  $\sum_{k=1}^{K'} \sum_{i=1}^N \mathbf{Z}_{i,k} = N$  in **R-IQP** is a necessary but not sufficient condition for the constraints  $\sum_{k=1}^{K'} \mathbf{Z}_{i,k} = 1, \forall i$  in **IQP**. If  $\mathbb{B}$  collapse into  $\omega$ , every event  $e_i$  can intersect only one CC  $\mathcal{G}_k \implies \sum_{k=1}^{K'} \mathbf{Z}_{i,k} = 1$ ; hence, **R-IQP** is equivalent to **IQP**.  $\square$

## B.5. Proof of lower bound (39) in the main text

**Lemma 5.**

$$\underline{H}_c(\mathbf{x}_j; \mathbb{B}) \leq \min_{\omega \in \mathbb{B}} H_c(\mathbf{x}_j; \omega) \quad (15)$$

with equality achieved if  $\mathbb{B}$  is singleton, i.e.,  $\mathbb{B} = \{\omega\}$ .

*Proof.* Analogous to Lemma 1, we prove this Lemma by contradiction. Let  $\omega^*$  be the optimiser for the RHS of (15). If

$$H_c(\mathbf{x}_j; \omega^*) < \underline{H}_c(\mathbf{x}_j; \mathbb{B}), \quad (16)$$

it follows from the definition of pixel intensity (Eq. (1) in the main text) and its lower bound (Eq. (39) in the main text) that

$$\|\mathbf{x}_j - f(\mathbf{u}_i, t_i, \omega^*)\| > \|\mathbf{x}_j - \mathbf{c}_i(\mathbb{B})\| + \|\mathbf{y}_i(\mathbb{B})\|, \quad (17)$$

for at least one  $i = 1, \dots, N$ .

In words, the longest distance between  $\mathbf{x}_j$  and the disc  $\mathcal{D}_i(\mathbb{B})$  is less than the distance between  $\mathbf{x}_j$  and the optimal position  $f(\mathbf{u}_i, t_i, \omega^*)$ . However,  $f(\mathbf{u}_i, t_i, \omega^*)$  is always inside the disc  $\mathcal{D}_i(\mathbb{B})$ , and hence Eq. (17) cannot hold. If  $\mathbb{B} = \{\omega\}$ , then from definition (39) in the main text  $\underline{H}_c(\mathbf{x}_j; \mathbb{B}) = H_c(\mathbf{x}_j; \omega)$ .  $\square$

## B.6. Proof of lower bound (41) in the main text

**Lemma 6.**

$$\underline{\mu}_d(\mathbb{B}) \leq \min_{\omega \in \mathbb{B}} \frac{1}{P} \sum_{j=1}^P H_d(\mathbf{x}_j; \omega), \quad (18)$$

with equality achieved if  $\mathbb{B}$  is singleton, i.e.,  $\mathbb{B} = \{\omega\}$ .

*Proof.* This lemma can be demonstrated by contradiction. Let  $\omega^*$  be the optimiser of the RHS of (18). If

$$\frac{1}{P} \sum_{j=1}^P H_d(\mathbf{x}_j; \omega^*) < \underline{\mu}_d(\mathbb{B}), \quad (19)$$

after replacing the pixel intensity and the lower bound pixel value with they definitions (Eqs. (3) and (41) in the main text) in (19), it leads to

$$\sum_{i=1}^N \sum_{j=1}^P \mathbb{I}(f(\mathbf{u}_i, t_i; \omega^*) \text{ lies in pixel } \mathbf{x}_j) \quad (20a)$$

$$< \sum_{i=1}^N \mathbb{I}(\mathcal{D}_i \text{ fully lie in the image plane}). \quad (20b)$$

In words, for every warped event  $f(\mathbf{u}_i, t_i; \omega^*) \in \mathcal{D}_i$  that lies in any pixel  $\mathbf{x}_j \in X$  of the image plane, the discs  $\mathcal{D}_i$  must fully lie in the image plane. Since (20a) is a less restricted problem than (20b), (19) cannot hold. If  $\mathbb{B} = \{\omega\}$ ,  $\mathcal{D}_i = f(\mathbf{u}_i, t_i; \omega)$ ; therefore, the two sides in (18) are equivalent.  $\square$

## C. Additional qualitative results

Figs. 1, 2 and 3 show additional motion compensation results (Sec. 4.2 in the main text) for subsequences from *boxes*, *dynamic* and *poster*.

## References

- [1] Rolf Clackdoyle and Catherine Mennessier. Centers and centroids of the cone-beam projection of a ball. *Physics in Medicine & Biology*, 56(23):7371, 2011. 1
- [2] Yinlong Liu, Yuan Dong, Zhijian Song, and Manning Wang. 2d-3d point set registration based on global rotation search. *IEEE Transactions on Image Processing*, 28(5):2599–2613, 2018. 1

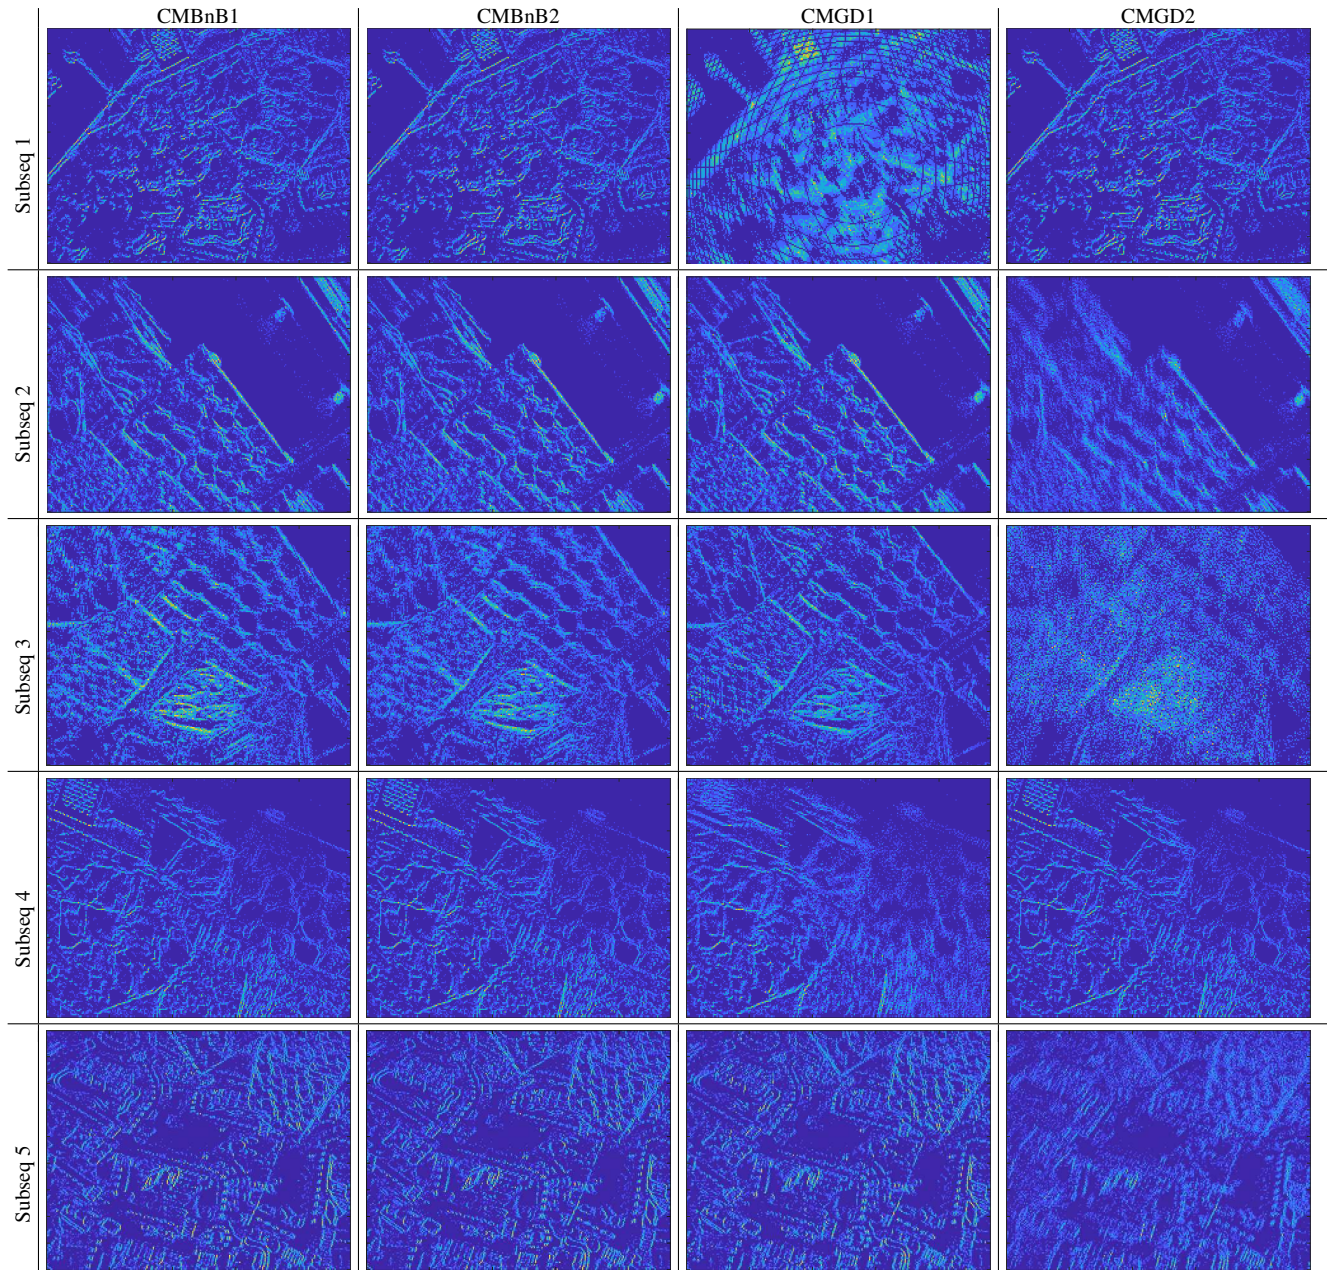

Figure 1. Qualitative results (motion compensated event images) for *boxes*.

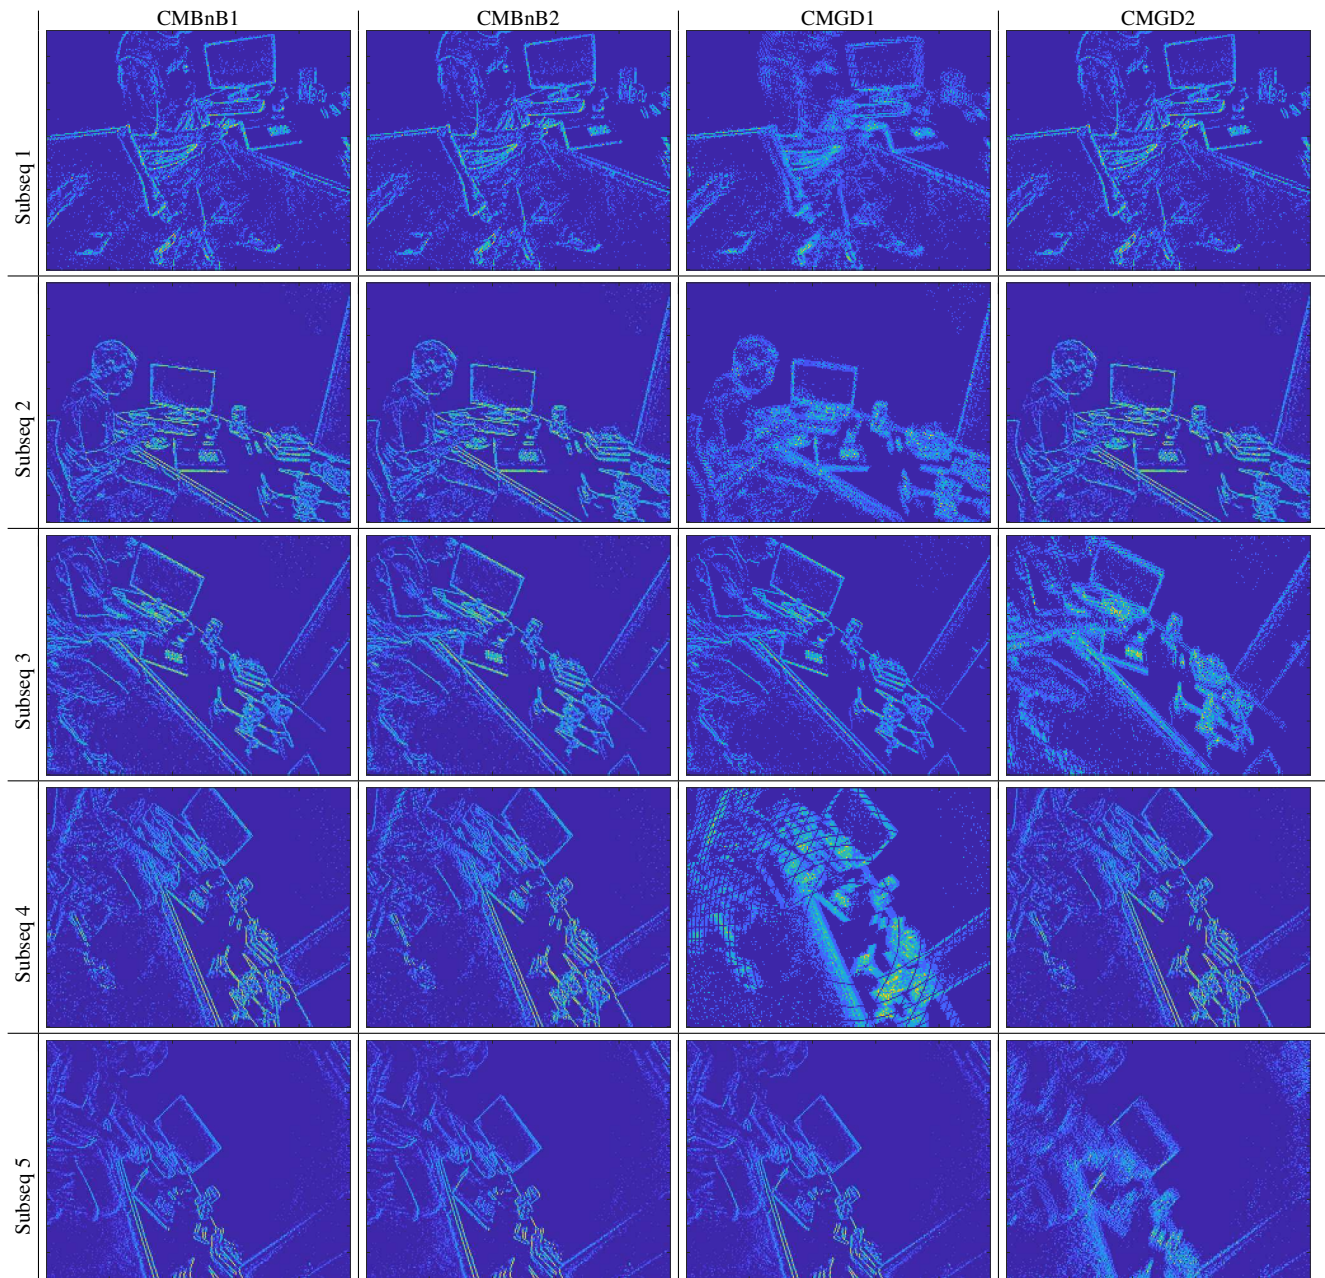

Figure 2. Qualitative results (motion compensated event images) for *dynamic*.

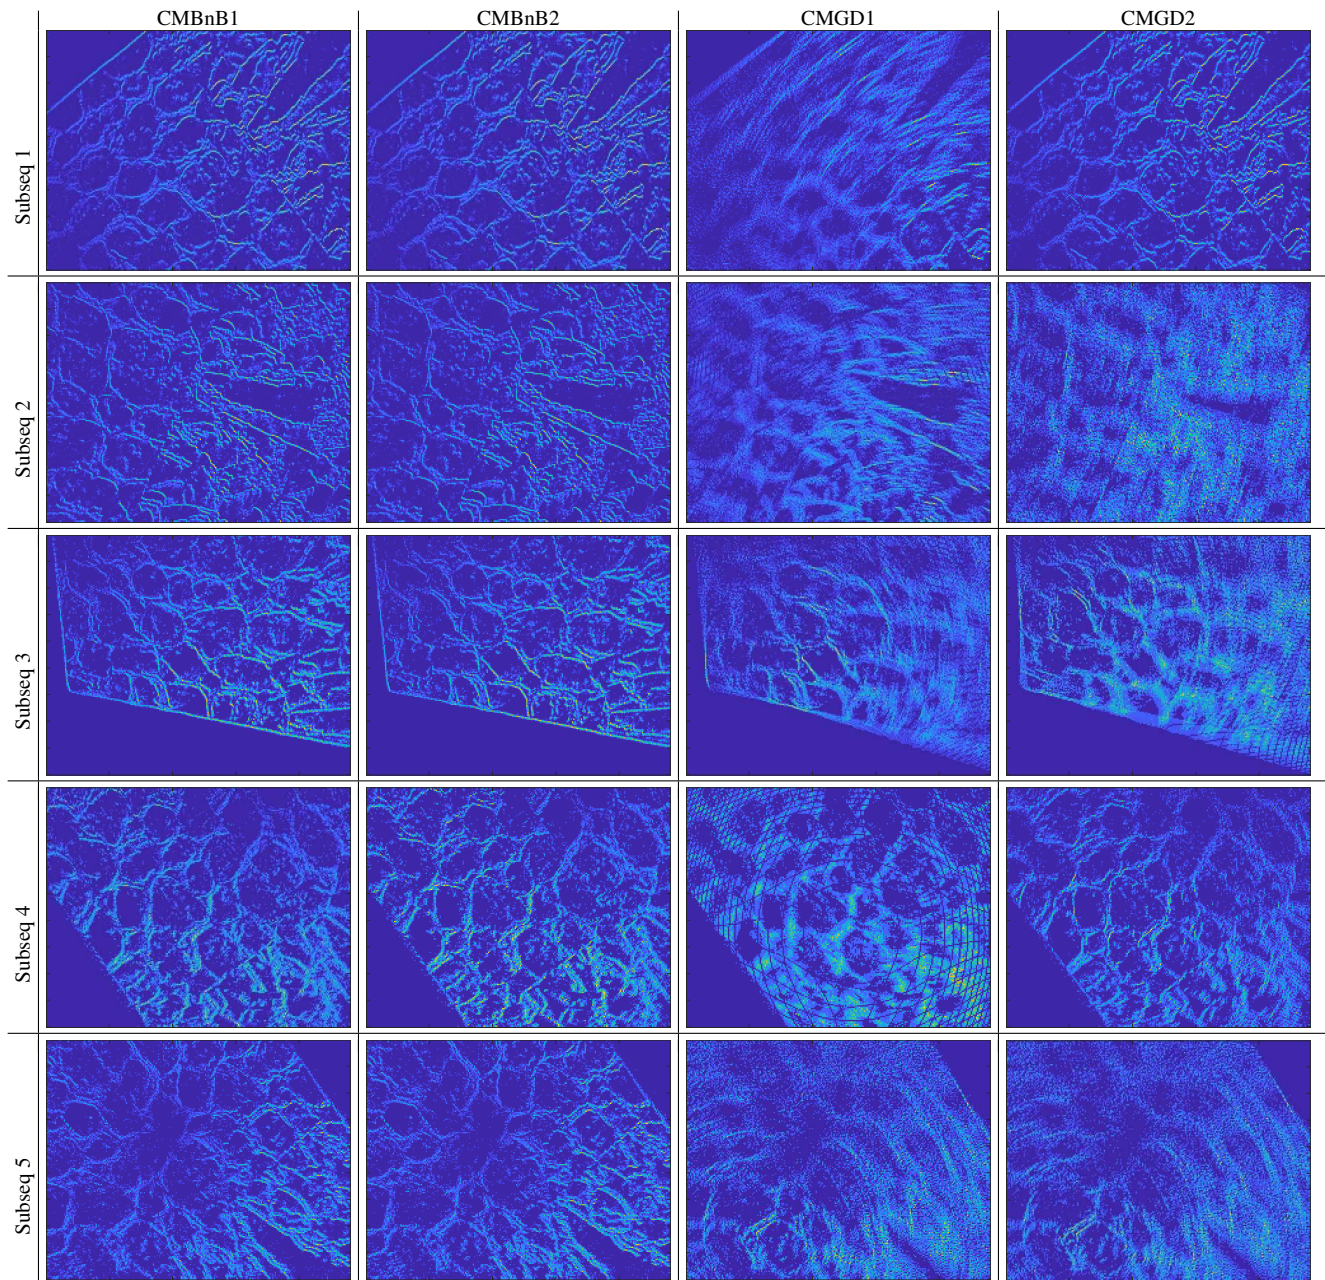

Figure 3. Qualitative results (motion compensated event images) for *poster*.
